# Supplementary material for: Lactase Persistence and Lipid Pathway Selection in the Maasai
Source: PLoS One. 2012 Sep 28;7(9):e44751. doi: 10.1371/journal.pone.0044751 (PMC3461017; doi:10.1371/journal.pone.0044751)
Supplement: Table S2 — Genomic regions identified as selection candidates in MKK using Fst and clustering. SNPs having empirical p-value <0.001 with respect to the distribution of intergenic Fst scores were clustered into regions of high linkage disequilibrium using genotype R2 between SNPs. Clusters with maximum XP-EHH score >3 were identified as being MKK associated. Also listed are the maximum Fst score and the maximum XP-EHH score of any SNP in the genomic extent of the cluster. (XLSX) [file pone.0044751.s002.xlsx]

## Sheet: Sheet1
Number of SNPs	Chromosome	Start location	Stop location	Genes in region	Max Fst	Max XP-EHH Score	SNPs
123	2	135036696	136726567	RAB3GAP1, ZRANB3, DARS, R3HDM1, TMEM163, YSK4, LCT, UBXN4, MCM6, MGAT5, CCNT2	0.382179	12.2022	rs4954220, rs6736613, rs6711370, rs309158, rs7605229, rs10186594, rs1446586, rs4954246, rs4954226, rs1370533, rs10174944, rs4954228, rs6430594, rs2304366, rs4953947, rs4954240, rs6736412, rs6715171, rs6430572, rs309152, rs7561565, rs7603310, rs7572378, rs6749387, rs9798267, rs522227, rs6720726, rs11900832, rs3769012, rs1598279, rs1050115, rs1840413, rs2290518, rs2439568, rs11903298, rs309170, rs3…
33	2	78305622	78500655	-	0.311287	3.80462	rs1437982, rs17015041, rs13425498, rs7593405, rs1405274, rs2164849, rs6547186, rs6716814, rs1370631, rs6748053, rs7573381, rs7593620, rs1852328, rs1816652, rs11891218, rs7573663, rs2164850, rs6715934, rs1370632, rs7571032, rs1550248, rs4488688, rs1347725, rs2901929, rs1370633, rs1370637, rs7606906, rs4853378, rs1437983, rs1595422, rs4853374, rs6708183, rs723705
28	12	56402204	56754137	PAN2, OBFC2B, SLC39A5, APOF, STAT2, CS, RNF41, IKZF4, SMARCC2	0.283355	3.0235	rs2643626, rs7489249, rs1274494, rs901073, rs2456972, rs2695784, rs11171777, rs2629453, rs11575221, rs2371494, rs2695789, rs2930788, rs2066808, rs772922, rs773658, rs1701706, rs2658479, rs773659, rs2695782, rs4759218, rs2463365, rs2020854, rs1918496, rs7311008, rs773663, rs773665, rs1689518, rs2695783
13	3	191929784	191990575	FGF12	0.271811	5.22153	rs7633010, rs12630527, rs9820902, rs4687295, rs9869920, rs4687309, rs1552832, rs4687304, rs940901, rs9818651, rs4687305, rs6776353, rs994021
7	5	115126388	115223035	ATG12, AP3S1	0.26561	3.86979	rs6880889, rs26538, rs13174348, rs258737, rs3797567, rs364208, rs1058600
19	2	163048404	163152351	IFIH1, FAP	0.261365	3.108	rs7558405, rs16846499, rs6734769, rs741439, rs7603431, rs6730036, rs13394899, rs4664460, rs10439256, rs11891916, rs11891191, rs10439291, rs13399624, rs12476567, rs13418892, rs10439290, rs10930046, rs3788970, rs3747518
17	7	99053816	99436198	ZNF498, CYP3A4, CPSF4, CYP3A7, CYP3A43	0.260343	3.29042	rs7808022, rs776746, rs3735451, rs2740566, rs10242455, rs12535424, rs2687136, rs6945984, rs2461610, rs10282706, rs4646457, rs642761, rs585071, rs800672, rs2242480, rs667660, rs1851426
4	1	12296232	12319994	VPS13D	0.253038	3.06035	rs374450, rs235243, rs6541016, rs235256
4	22	49978502	50077531	-	0.2441	3.73226	rs10854874, rs5770567, rs5770562, rs5770651
5	5	32128179	32159329	GOLPH3	0.241683	3.06173	rs671879, rs161541, rs949826, rs184001, rs661309
4	5	14747247	14750823	ANKH	0.23709	6.80046	rs6864641, rs153920, rs31934, rs875525
4	14	36033703	36201722	RALGAPA1	0.221162	3.51706	rs8021444, rs10138222, rs2899839, rs12892721
2	2	136917330	136921703	-	0.218321	8.54891	rs10180515, rs4954394
2	1	198692364	198745866	PTPRC	0.211716	3.13829	rs1011338, rs7538393
4	2	137580234	137595545	-	0.208814	4.87119	rs778187, rs16855716, rs778188, rs10496758
5	12	111414527	111502280	CUX2	0.208749	3.39271	rs7315314, rs7980382, rs7954644, rs7965684, rs7961821
3	17	75423198	75431978	SEPT9	0.200281	5.02357	rs312907, rs312902, rs312893
4	18	66714832	66724690	CCDC102B	0.200067	5.7042	rs1431409, rs12458569, rs4891721, rs2163477
3	1	74807337	74842787	TNNI3K	0.193194	3.99339	rs12027334, rs3819942, rs6687072
3	3	185752767	185805993	ETV5	0.191577	4.56897	rs9820527, rs4686730, rs4686728
2	5	115885574	115885672	SEMA6A	0.187482	5.47831	rs254229, rs254227
3	11	8129296	8202838	RIC3	0.186101	3.21777	rs10734629, rs4758042, rs12808387
4	4	140544895	140643064	MAML3, MGST2	0.185455	3.43661	rs345981, rs2646076, rs4147590, rs17355469
11	1	182759592	182858693	DHX9, NPL	0.18527	3.59931	rs10494551, rs10911155, rs6694228, rs7528694, rs1045971, rs6678876, rs4275414, rs7554927, rs6674915, rs6679583, rs6701846
4	2	136869873	136910273	-	0.17835	8.65336	rs953387, rs2734871, rs4954566, rs6715785
7	6	51709404	51746280	PKHD1	0.175287	3.53363	rs9349603, rs1326608, rs4715252, rs982874, rs9382044, rs2180719, rs9382043
