# Supplementary material for: Lactase Persistence and Lipid Pathway Selection in the Maasai
Source: PLoS One. 2012 Sep 28;7(9):e44751. doi: 10.1371/journal.pone.0044751 (PMC3461017; doi:10.1371/journal.pone.0044751)
Supplement: Table S4 — Genomic regions identified as selection candidates in MKK using the iHS statistic. Sliding windows of 50 SNPs each were scored for the fraction of SNPs with |iHS| >2. The top 0.02% of non-overlapping windows were identified as candidates for selection. These windows were then merged on the basis of linkage disequilibrium (estimated using genotype R2 between SNPs with |iHS| >2). (XLS) [file pone.0044751.s004.xls]

## Sheet: Sheet1
Chromosome	# of SNPs in cluster with |iHS| > 2	Number of SNPs in the genomic extent of the cluster	Fraction of high scoring SNPs in cluster	Cluster start SNP	Cluster start position (GRCh37)	Cluster end SNP	Cluster end position (GRCh37)	Average |iHS| of high scoring SNPs in cluster	Max |iHS| in cluster	Genes	GWAS SNPs	Cluster SNPs
2	545	1187	0.459141	rs6430423	134221398	rs1432206	137892309	3.45744	6.33912	LCT, MGAT5, NCKAP5, DARS, ZRANB3, R3HDM1, TMEM163, RAB3GAP1, THSD7B, CCNT2, YSK4, UBXN4, MCM6		rs895539, rs1042712, rs935480, rs1432288, rs17293519, rs895535, rs10496754, rs6745602, rs6743537, rs3769008, rs10496758, rs1868320, rs1446736, rs1849873, rs1446733, rs7594893, rs1427611, rs2117511, rs2117510, rs6430456, rs1427616, rs685113, rs2874739, rs16829241, rs6711370, rs4954246, rs10803546, rs7569670, rs474031, rs4954566, rs4954564, rs4954561, rs4954156, rs16855739, rs4954096, rs4954095, rs…
13	26	44	0.590909	rs9508590	30496779	rs4769795	30565298	3.0661	5.23379	-		rs9314990, rs17074067, rs576712, rs818608, rs7320355, rs683247, rs7990062, rs12429187, rs927733, rs2388239, rs9508607, rs643508, rs529547, rs4769795, rs503693, rs17074065, rs17074100, rs634413, rs638330, rs7322038, rs11147404, rs1325368, rs9508590, rs11842394, rs4769781, rs649164
7	45	50	0.9	rs17364645	20373632	rs11980974	20468718	3.36218	5.01153	ITGB8	(200kb down) rs10950821 – Response to statin therapy	rs4473914, rs6968952, rs10251386, rs10231365, rs17455883, rs10239311, rs10257338, rs17142784, rs17364645, rs17455862, rs17142783, rs10215885, rs3823974, rs10265149, rs7811612, rs3807931, rs11980974, rs3807935, rs1023522, rs6953445, rs11973964, rs10486391, rs6954502, rs13233149, rs1042277, rs12538581, rs2158252, rs10263803, rs7782524, rs2107129, rs2107128, rs4721902, rs17364659, rs4719613, rs11762…
2	69	101	0.683168	rs7580618	176089888	rs12693068	176422005	3.18185	4.62592	-	Rs2461751 - Electrocardiographic conduction measures	rs35780935, rs7558140, rs10930699, rs2461759, rs7565266, rs1533887, rs1533885, rs10207413, rs7586946, rs1522829, rs2056509, rs13418640, rs35375763, rs2461773, rs4274574, rs1866925, rs2437924, rs1403370, rs2437901, rs2461766, rs12988850, rs268176, rs6736485, rs7603466, rs6717587, rs2437923, rs268187, rs268189, rs12611773, rs41455148, rs2177250, rs268165, rs1357396, rs6739734, rs7579257, rs12693068…
11	36	49	0.734694	rs10891158	110532348	rs226117	110663647	2.85875	4.48026	ARHGAP20		rs6589170, rs12281086, rs6589176, rs12289476, rs7929970, rs7127275, rs889890, rs2194424, rs7929139, rs7122128, rs226117, rs2077943, rs6589169, rs190125, rs1540746, rs10891158, rs7129015, rs7936723, rs7121407, rs7952191, rs7929561, rs12289680, rs6589161, rs1449703, rs889889, rs12275049, rs2358377, rs12273414, rs11213541, rs7951655, rs17111782, rs7940048, rs226121, rs3930078, rs226118, rs4937385
9	59	102	0.578431	rs2164183	83127968	rs1576758	83382243	2.81894	4.47058	-	(320kb up) rs12554086 - RR interval (heart rate)	rs13299090, rs2183004, rs7034624, rs10780461, rs7048730, rs7865140, rs11790866, rs1887770, rs7848921, rs11138755, rs10780435, rs1328503, rs17083941, rs12336241, rs2164183, rs17083964, rs7019493, rs1576758, rs10867571, rs12236640, rs4877602, rs9644986, rs7034238, rs1332031, rs7036247, rs1888853, rs1410542, rs1328519, rs10867594, rs1887769, rs4404990, rs982081, rs7022280, rs10867602, rs7037098, rs1…
5	23	33	0.69697	rs1875513	14657062	rs10052744	14753764	3.15346	4.42854	FAM105B, ANKH	(900kb up) rs2896103, rs7715811, rs1502050 - Subclinical atherosclerosis traits	rs152788, rs153920, rs153926, rs6892588, rs31968, rs697571, rs149391, rs31929, rs10052744, rs10080009, rs13170282, rs2291943, rs31925, rs6864641, rs153932, rs875525, rs4702048, rs16903692, rs4702043, rs697568, rs697569, rs4702047, rs1875513
18	33	47	0.702128	rs1961712	66652846	rs1835655	66765215	3.09421	4.40167	CCDC102B		rs4891717, rs638277, rs650388, rs1117144, rs8094964, rs10503137, rs12607657, rs12456513, rs7505444, rs3933569, rs7241924, rs12458569, rs8085022, rs1961712, rs930164, rs649951, rs662932, rs9961753, rs666498, rs1835655, rs4633817, rs4891353, rs11873439, rs11874149, rs10871642, rs1431418, rs930165, rs4310968, rs4891721, rs988525, rs2163477, rs1431409, rs1982040
11	22	38	0.578947	rs11032481	34025053	rs4756111	34189564	2.74854	4.3751	CAPRIN1, NAT10, ABTB2		rs11032481, rs7121633, rs12418412, rs4756111, rs7925202, rs2957518, rs3852514, rs2982587, rs10836149, rs2957514, rs7120520, rs16925167, rs1518918, rs10768046, rs2982619, rs17367679, rs16925182, rs2957509, rs7951306, rs4587708, rs2473929, rs16925114
2	28	49	0.571429	rs9808377	179421694	rs2627037	179606538	2.47706	4.28857	TTN	( 35kb down) rs12476289 – QT interval	rs3731746, rs2742343, rs2303828, rs2742327, rs2562830, rs16866418, rs9808377, rs2042995, rs2042996, rs2627037, rs3829746, rs10183237, rs2472751, rs13398235, rs4894030, rs2366751, rs12693162, rs6750145, rs1560221, rs16866420, rs12622914, rs2562834, rs4894029, rs2163009, rs2627043, rs4893852, rs2562838, rs1001238
14	20	25	0.8	rs7144362	105792959	rs6576094	105907642	2.48812	4.22844	PACS2, MTA1		rs9671295, rs8010649, rs7153174, rs4076933, rs4983614, rs4983617, rs4983619, rs6576086, rs6576087, rs11621365, rs6576094, rs7144362, rs11849421, rs8008801, rs8010888, rs10144583, rs4983407, rs9672141, rs8021311, rs7144207
5	50	67	0.746269	rs10477973	108990708	rs1946607	109217428	2.79356	4.21905	MAN2A1	(800kb down) rs17132261 - Cardiac structure and function	rs10038829, rs724784, rs845741, rs2077221, rs11745926, rs31609, rs4569915, rs1005665, rs4957580, rs1370959, rs9326786, rs17163950, rs2284988, rs1438661, rs1438662, rs10452541, rs10067856, rs12519496, rs12514321, rs7737286, rs10051841, rs7726985, rs2301012, rs17162179, rs1368356, rs17162036, rs1432805, rs845734, rs17162024, rs11948554, rs6897334, rs12518635, rs1946607, rs6877440, rs4957579, rs1047…
9	34	49	0.693878	rs395992	107973277	rs10820795	108067684	2.82942	4.19169	SLC44A1		rs227887, rs424495, rs384947, rs383126, rs366144, rs421495, rs193007, rs10991611, rs7854392, rs384924, rs7020982, rs422084, rs438299, rs327983, rs10820795, rs327947, rs7866947, rs327964, rs328018, rs182756, rs378716, rs328012, rs328014, rs16924420, rs440290, rs7854407, rs376926, rs395992, rs327991, rs327992, rs327995, rs327997, rs423477, rs370629
9	23	30	0.766667	rs1475223	3869844	rs582393	3919130	2.99252	4.18491	GLIS3	(370kb down) Rs7034200 - Fasting glucose-related traits, (370kb down) rs7020673 rs10758593 - Type 1 diabetes	rs10814737, rs543563, rs611685, rs10122183, rs12235312, rs1547126, rs1547127, rs582393, rs519644, rs544456, rs1475223, rs1471008, rs702268, rs2380906, rs1373851, rs583963, rs10758532, rs10974042, rs657077, rs630219, rs570649, rs4741863, rs1373849
7	24	50	0.48	rs12535424	99053816	rs2687075	99314986	2.69819	4.1195	ZNF789, CPSF4, ATP5J2, FAM200A, ZNF655, ZNF498, CYP3A7, ZKSCAN5, CYP3A5	Rs11761528 - Serum dehydroepiandrosterone sulphate levels (aging), rs7792939 – hip circumference	rs10235235, rs12535424, rs11974702, rs6947826, rs3735453, rs10242455, rs776746, rs2687079, rs2687076, rs2687075, rs1581492, rs7808022, rs2037498, rs10211, rs2687087, rs6947941, rs11973801, rs2222411, rs4646457, rs1879859, rs1859690, rs17161761, rs2740565, rs15524
9	23	41	0.560976	rs987416	13812037	rs2224553	13867306	2.95892	4.06614	-		rs16931028, rs7021837, rs9406469, rs986974, rs987416, rs16930996, rs16930999, rs13295592, rs10961271, rs7047775, rs9407550, rs7019634, rs16931031, rs7036600, rs2224553, rs7036705, rs7849155, rs9407557, rs7847096, rs9298691, rs7873661, rs726353, rs9407547
11	48	50	0.96	rs2008476	75470813	rs11236588	75678647	3.07846	4.05918	UVRAG, DGAT2		rs7121639, rs10899145, rs7947418, rs7108178, rs1380077, rs11236588, rs6592615, rs5026790, rs7101806, rs7104218, rs2168947, rs7102544, rs12280464, rs17134394, rs7941207, rs11236540, rs11828568, rs11236561, rs7951333, rs7122386, rs12278257, rs17134442, rs7111334, rs7126845, rs7114160, rs7927868, rs7933235, rs7118039, rs7120267, rs3740849, rs7107742, rs7122276, rs2371373, rs10899134, rs2099856, rs10…
2	24	42	0.571429	rs6760764	12294875	rs1453487	12366781	2.78351	4.04092	-		rs1453487, rs4669826, rs4669825, rs6760764, rs12692469, rs10929792, rs12995723, rs1869382, rs1225213, rs1225214, rs7558139, rs1597982, rs1347803, rs12617169, rs17618039, rs7598791, rs12692473, rs10185097, rs13033675, rs13000342, rs6432266, rs6432269, rs6432268, rs13006430
14	24	49	0.489796	rs10484165	97426813	rs10133922	97505011	2.81749	4.02474	-		rs861323, rs1569801, rs1569800, rs10143399, rs8015145, rs856277, rs8017137, rs4905575, rs856232, rs10133922, rs12880142, rs8023002, rs8011841, rs1983654, rs1983655, rs10136547, rs17094781, rs710270, rs10484165, rs856247, rs742879, rs1290233, rs1535095, rs1280071
8	22	50	0.44	rs11991859	145839058	rs3866995	146082167	2.52911	3.95475	COMMD5, LOC100287170, LOC100129596, ARHGAP39, RPL8, ZNF7, ZNF251, ZNF34, LOC100287297, ZNF517		rs1209881, rs1735192, rs2954333, rs11991859, rs2958516, rs1735430, rs11784860, rs3866995, rs1735412, rs1625919, rs2242651, rs2242650, rs1735189, rs3882690, rs1735166, rs1735169, rs2727229, rs7013296, rs7839569, rs1735405, rs4610795, rs2958522
18	26	41	0.634146	rs4547444	64898982	rs1350087	65008319	2.89795	3.94898	-		rs10782028, rs4047730, rs9950726, rs9957192, rs9959528, rs4128677, rs9319727, rs12605618, rs4891598, rs2333710, rs1598486, rs1350087, rs4072860, rs4243302, rs3935256, rs9945435, rs8090284, rs11151359, rs9319730, rs7241718, rs2333706, rs7232857, rs4547444, rs9953695, rs17077075, rs9953469
15	23	48	0.479167	rs7178351	39730154	rs2618157	39844315	2.69576	3.92461	-	(30kb down) THBS1	rs7178351, rs4924363, rs1159994, rs936532, rs4924364, rs1158915, rs1551945, rs11857970, rs4924362, rs16969236, rs16969104, rs1947782, rs1947783, rs4244571, rs2618157, rs7171244, rs8032900, rs1478606, rs10520130, rs899285, rs16952151, rs11070210, rs16969116
9	22	48	0.458333	rs733329	125624164	rs7872021	125854871	2.70342	3.88605	ZBTB6, RABGAP1, RC3H2, ZBTB26		rs1147322, rs12686096, rs10818776, rs7031933, rs6478576, rs677922, rs700074, rs591883, rs7872021, rs7032485, rs733329, rs3887115, rs3824535, rs803714, rs7046980, rs12337223, rs700062, rs7039725, rs2793003, rs12350789, rs2487387, rs4838029
3	20	43	0.465116	rs1031246	63028072	rs930632	63119037	2.505	3.87076	-		rs939093, rs6780257, rs1900581, rs1031246, rs7622156, rs4688372, rs6772243, rs1374689, rs930632, rs2367598, rs1348938, rs982678, rs6445312, rs1447449, rs921160, rs41328147, rs12629597, rs749244, rs1374690, rs2218615
1	26	46	0.565217	rs7555154	104818279	rs11185445	104898703	2.52784	3.86468	-		rs6697722, rs7521048, rs6664343, rs11185445, rs11185426, rs2055235, rs12034300, rs1391212, rs1909043, rs12035919, rs9628999, rs11809638, rs6702438, rs6701091, rs6702307, rs1995118, rs9325374, rs17021432, rs7555154, rs4607887, rs7526427, rs6693042, rs1497675, rs1497676, rs2317259, rs1603632
8	24	30	0.8	rs11135787	24110439	rs11998631	24201274	2.63619	3.86431	ADAM28		rs11135787, rs6996616, rs11998631, rs12677577, rs6980834, rs7819362, rs10156301, rs11996594, rs2089827, rs11994522, rs7004152, rs7829443, rs7004204, rs10106804, rs7018020, rs11987905, rs6999677, rs7004514, rs11989219, rs11992857, rs17051819, rs6557726, rs11991134, rs2278468
3	21	46	0.456522	rs777016	47936671	rs12495221	48179178	2.73879	3.84804	MAP4		rs6770477, rs9811277, rs34380889, rs7619882, rs4392441, rs7430879, rs7427418, rs9814961, rs2053767, rs6770467, rs777015, rs2166770, rs777016, rs9854454, rs7374516, rs12495221, rs7653368, rs4858871, rs5012971, rs2882668, rs13075457
11	60	99	0.606061	rs938727	84925643	rs290179	85400063	2.62437	3.8438	DLG2, TMEM126A, CCDC89, CREBZF		rs3862782, rs4944512, rs454388, rs286526, rs431606, rs11824843, rs531331, rs12788992, rs951729, rs2000962, rs290180, rs11603256, rs10501590, rs497607, rs286040, rs512910, rs631375, rs286028, rs10751124, rs7117010, rs1517308, rs12281150, rs2203702, rs7949567, rs1863256, rs7925739, rs4301809, rs471786, rs530323, rs17148063, rs1876872, rs450444, rs10898392, rs497698, rs7940610, rs4944523, rs2196168,…
6	20	29	0.689655	rs3799570	167030620	rs9366037	167072503	2.9256	3.82011	RPS6KA2		rs9348164, rs4145431, rs6933990, rs9295357, rs7741396, rs9347140, rs9348162, rs10484525, rs6937198, rs1984413, rs3799570, rs12202785, rs3778372, rs12055452, rs16899269, rs9366037, rs7755114, rs9366035, rs9348156, rs12333057
10	21	46	0.456522	rs2153302	28818536	rs1265837	28943648	2.95099	3.81589	WAC		rs332123, rs2153302, rs332136, rs2807761, rs1265840, rs1265834, rs1265837, rs2790444, rs2807754, rs1265846, rs1265830, rs2790457, rs2532744, rs2790455, rs2790454, rs332144, rs332145, rs2772431, rs332157, rs2772433, rs2480551
21	21	25	0.84	rs1153287	30685611	rs2832317	30807013	2.73632	3.79153	BACH1	(600kb down) Rs9305406 - Response to statin therapy	rs2832308, rs2832309, rs1153287, rs2832302, rs2832310, rs2832313, rs411697, rs425989, rs2832291, rs2832317, rs2832286, rs1153295, rs1153294, rs372883, rs388707, rs2239572, rs7277179, rs7277244, rs2027605, rs8126522, rs117214
2	53	92	0.576087	rs7569510	200853730	rs295124	201239923	2.53982	3.77782	SPATS2L		rs12467109, rs295114, rs159321, rs159320, rs13026730, rs295118, rs952530, rs1729413, rs3094758, rs3094759, rs1729420, rs7569510, rs1653299, rs3769471, rs6722092, rs3094771, rs296781, rs4673912, rs2136585, rs3115423, rs4673802, rs1509830, rs1144429, rs12463436, rs12473681, rs295124, rs1966710, rs295149, rs7575286, rs4233996, rs295141, rs295142, rs4673855, rs295145, rs10497856, rs1550293, rs1900706…
17	22	27	0.814815	rs9892170	16501760	rs4792762	16564034	2.83278	3.76153	ZNF624		rs7217544, rs16959857, rs9904901, rs11871369, rs6502514, rs8074487, rs4792761, rs4792762, rs9910087, rs8065506, rs8072900, rs7222875, rs1005370, rs7218241, rs7226328, rs8075988, rs9892170, rs9910842, rs9894637, rs8069286, rs9889868, rs9911518
8	28	51	0.54902	rs6989161	23851021	rs7825409	24065882	2.83217	3.7232	-		rs1384895, rs3106318, rs10503741, rs288382, rs10503746, rs6989161, rs1825369, rs1483821, rs7843621, rs11135781, rs13438843, rs7825409, rs10102166, rs1483818, rs17051664, rs288372, rs7817177, rs10101419, rs6996722, rs7016438, rs7824619, rs11988558, rs7823178, rs7827129, rs6997885, rs7836161, rs2626359, rs7827515
2	23	47	0.489362	rs333872	118019702	rs10864956	118180695	2.68889	3.67664	-		rs10864955, rs10864956, rs2421907, rs33945510, rs6754148, rs4308131, rs334822, rs334843, rs334826, rs334829, rs1516240, rs2421933, rs6723614, rs6757570, rs333872, rs1400127, rs1516236, rs1516237, rs10177579, rs334851, rs4849543, rs4599119, rs334830
2	25	39	0.641026	rs13396043	182616031	rs13389121	182805600	3.01573	3.64748	SSFA2		rs10177346, rs1427334, rs6754481, rs16867497, rs1881158, rs1106013, rs7586410, rs10179547, rs13419200, rs10183527, rs10205426, rs9807949, rs10200243, rs3815878, rs4597474, rs16867500, rs13428784, rs13389121, rs1365806, rs13396043, rs10221891, rs2368236, rs6734324, rs13424337, rs16867502
6	22	42	0.52381	rs4424070	57618440	rs9476380	57928874	2.47697	3.63963	-		rs7765051, rs4424070, rs4098822, rs9476360, rs4276508, rs9370683, rs9396413, rs7758052, rs11965101, rs9476380, rs4317411, rs1972363, rs4715853, rs4410728, rs4541749, rs12661710, rs6900431, rs7768958, rs4440467, rs9464564, rs4473858, rs4425587
2	27	46	0.586957	rs10928762	127046316	rs34199712	127187977	2.40752	3.63544	-	(500 kb down) rs13418717 - Heart failure	rs360269, rs11684271, rs359682, rs359683, rs360341, rs359685, rs360264, rs359687, rs11674761, rs360323, rs360322, rs34199712, rs11688203, rs13005527, rs10928762, rs13031201, rs12992542, rs360390, rs360275, rs359690, rs359697, rs2896866, rs360370, rs360259, rs12621460, rs437866, rs13004325
3	27	43	0.627907	rs323873	51993725	rs893055	52177348	2.62088	3.62951	DUSP7, ACY1, POC1A, ABHD14A, ABHD14B, PCBP4, WDR51A, C3orf74	(300kb down) rs6784615 - Waist-hip ratio	rs9865330, rs876782, rs4687607, rs9848727, rs12495536, rs323893, rs735768, rs323897, rs323873, rs731684, rs323874, rs893056, rs893055, rs4687810, rs2878438, rs323892, rs9809254, rs749995, rs4687805, rs323895, rs7644325, rs13316105, rs12496447, rs2015691, rs747343, rs6778442, rs379462
5	20	48	0.416667	rs1389879	3118894	rs457099	3156312	2.65198	3.60339	-		rs1215405, rs10069129, rs7726783, rs6872141, rs468828, rs160909, rs166137, rs6888911, rs1215413, rs1238016, rs10045318, rs1441531, rs10866550, rs469508, rs903397, rs10043332, rs2044745, rs160560, rs1389879, rs457099
9	21	38	0.552632	rs1444835	75252221	rs1663741	75361124	2.81106	3.59828	TMC1		rs7026203, rs1663762, rs2793150, rs2487471, rs10118632, rs1037031, rs969205, rs1417614, rs2793180, rs1663741, rs2501917, rs1663740, rs1796993, rs1796991, rs1444826, rs1444835, rs2589609, rs2256491, rs1361531, rs2589605, rs1796976
1	62	90	0.688889	rs2867302	150653650	rs3849279	150944707	2.73612	3.58697	GOLPH3L, HORMAD1, CTSS, ARNT, SETDB1, LASS2, CTSK	Rs267734 – chronic kidney disease (9kb down), rs11205277 – height(700kb up)	rs6700022, rs1336900, rs12089989, rs12403255, rs11586422, rs7521898, rs7532045, rs2256355, rs2272214, rs2184833, rs11581757, rs10888395, rs11803569, rs7412396, rs868751, rs10305704, rs12410869, rs4970985, rs12086472, rs2867302, rs10888394, rs10399947, rs1889741, rs1889740, rs3849279, rs10888391, rs12063547, rs12072339, rs7538493, rs10888398, rs1336899, rs3768018, rs2867301, rs4537557, rs2275236, …
12	23	29	0.793103	rs7309225	123288439	rs6489247	123385443	2.66726	3.56884	VPS37B, CCDC62, HIP1R		rs3825143, rs7972447, rs10847742, rs1696326, rs10773627, rs9795629, rs11060152, rs6489247, rs1798569, rs2135014, rs4759355, rs7309225, rs921808, rs1671681, rs967281, rs10847749, rs10773599, rs4759382, rs3844369, rs12255, rs897391, rs897393, rs2271050
8	32	49	0.653061	rs11997161	141738587	rs13279233	141946474	2.99205	3.56266	PTK2		rs4961289, rs13279233, rs7008498, rs13251663, rs7001591, rs11167005, rs10089610, rs6994744, rs10111363, rs11775840, rs13261338, rs4961233, rs4246123, rs4246128, rs11991796, rs3923115, rs11781505, rs4961290, rs11777839, rs10105905, rs11786116, rs10875458, rs13255947, rs4291312, rs9650572, rs13271554, rs4434666, rs13250787, rs10090774, rs1868280, rs11778798, rs11997161
10	32	43	0.744186	rs1199088	59909204	rs1867573	60042972	2.75068	3.56085	IPMK, CISD1		rs1698402, rs2790242, rs1416764, rs2790241, rs2790182, rs2790189, rs1308356, rs1199096, rs1416763, rs2590307, rs1867571, rs1867573, rs11006086, rs2254775, rs2251039, rs2590313, rs2153281, rs2790236, rs6481383, rs2790179, rs2790216, rs1199103, rs2790170, rs2653505, rs2486491, rs1199088, rs2790155, rs1769044, rs1199085, rs1769025, rs2253192, rs2590339
21	21	42	0.5	rs2837188	41140052	rs94967	41195307	2.66764	3.559	IGSF5	(17kb up) Rs1735151 - hypertension	rs4818094, rs466303, rs462555, rs4816657, rs94967, rs458406, rs456412, rs1018352, rs1018350, rs2837215, rs464201, rs2837212, rs2837211, rs2837216, rs1571712, rs2837214, rs465258, rs2837225, rs2837208, rs460549, rs2837188
11	20	46	0.434783	rs2450122	77930345	rs10899488	78088754	2.90063	3.542	GAB2		rs4945265, rs1318241, rs2450130, rs4945261, rs901104, rs2510038, rs2511175, rs1017908, rs4944196, rs4944195, rs2450122, rs10899469, rs10899488, rs6592772, rs4492844, rs7116611, rs7101429, rs11602622, rs2450129, rs10899456
14	29	47	0.617021	rs7146607	96399382	rs7160402	96498227	2.54346	3.53222	-		rs4905412, rs11626041, rs1951302, rs1984548, rs2224441, rs1951300, rs2145631, rs8011771, rs2369443, rs1998245, rs12886951, rs2145628, rs7146607, rs11628024, rs6575562, rs4905408, rs2093274, rs11847484, rs7160402, rs999200, rs1951310, rs8011887, rs2146931, rs1998522, rs12879136, rs12588819, rs12894860, rs7156862, rs11628091
11	22	48	0.458333	rs7118429	101181227	rs7938729	101303980	2.68539	3.52694	-	(20kb down) TRPC6	rs1938987, rs11532049, rs2508357, rs2513159, rs6590849, rs12795332, rs7938729, rs7118429, rs7948518, rs7945321, rs1938988, rs1938994, rs1938998, rs7122352, rs2513160, rs2513148, rs2508358, rs2508371, rs6590854, rs2508352, rs7481005, rs7924880
20	22	45	0.488889	rs6075924	22512529	rs6048216	22581268	2.63205	3.52451	FOXA2		rs13040491, rs6048171, rs6048206, rs1203868, rs1055080, rs6048209, rs1337921, rs6036158, rs1203905, rs1203907, rs6075924, rs1203884, rs1203890, rs945982, rs6048216, rs6036140, rs1209523, rs1203876, rs6048184, rs1203917, rs1890208, rs6036142
2	31	47	0.659574	rs10187244	98816010	rs13418293	98970891	2.79058	3.52427	VWA3B, CNGA3		rs7588222, rs6715989, rs13430738, rs10176056, rs4374424, rs10201994, rs4851954, rs7606591, rs6725543, rs12470615, rs11889349, rs7571110, rs7606220, rs1394432, rs13427344, rs4851122, rs6543419, rs2102270, rs2221416, rs937726, rs4632400, rs10187244, rs11895654, rs1466944, rs13418293, rs7572757, rs11124096, rs7571001, rs7606070, rs17493655, rs11901562
14	26	41	0.634146	rs10152101	45420311	rs8017844	45609669	2.47652	3.52158	FAM179B, FANCM, PRPF39, FKBP3, KLHL28		rs10131615, rs10140222, rs28448551, rs10138997, rs17115811, rs10140049, rs28637857, rs2033385, rs10134071, rs8009193, rs10132547, rs8022008, rs10135890, rs10132949, rs1053667, rs11845956, rs12100842, rs11157424, rs7158846, rs8017844, rs10134598, rs8006685, rs10152101, rs3825625, rs17115787, rs3825627
7	21	48	0.4375	rs2732898	134653942	rs2348277	134800917	2.80271	3.52066	AGBL3, CALD1, LOC100287674		rs2348057, rs10215144, rs6946926, rs2348053, rs2732898, rs4404846, rs2348277, rs2348058, rs4348415, rs9642007, rs11979533, rs2732910, rs2718153, rs2718150, rs4236653, rs7805020, rs7786435, rs2718159, rs10227500, rs4333534, rs4366013
5	24	44	0.545455	rs10085125	66902674	rs4976122	67008917	2.74106	3.51703	-	(450kb up) rs1697137 - Carotid atherosclerosis in HIV infection	rs10075956, rs12654194, rs6895989, rs6866097, rs6891461, rs10077642, rs10077665, rs6887552, rs10085125, rs6896525, rs7701900, rs4976109, rs10063787, rs6862794, rs4976122, rs4437331, rs6890557, rs6892063, rs6449887, rs13172995, rs10213771, rs10041945, rs4078050, rs7703239
10	29	42	0.690476	rs1897515	118221256	rs2915768	118328243	2.52591	3.50213	PNLIPRP3	(150kb down) Rs740363 – Heart Failure	rs4570504, rs10787687, rs10736256, rs1897515, rs10787680, rs10885978, rs10749221, rs10787704, rs17094828, rs10510021, rs2420287, rs10510020, rs4751990, rs7898331, rs10736254, rs1431481, rs7077408, rs12257985, rs2420296, rs7080993, rs6585406, rs6585402, rs11197713, rs2915768, rs10787675, rs10885981, rs989022, rs7906587, rs4751987
12	28	49	0.571429	rs11112829	79505136	rs11113612	79701964	2.65363	3.50176	SYT1		rs1245819, rs1245820, rs1245837, rs1245810, rs1245835, rs1526952, rs1245814, rs11113612, rs7311549, rs1245840, rs1268463, rs1405498, rs8181778, rs10861797, rs10861795, rs10861755, rs1245822, rs2141701, rs11112829, rs10861717, rs1880867, rs2272500, rs7298799, rs10861757, rs7315303, rs1405500, rs1918193, rs1918191
15	23	47	0.489362	rs12914235	100942373	rs12899207	101045079	2.63033	3.50041	LASS3		rs2587760, rs2654581, rs2654637, rs7180354, rs7178422, rs4643297, rs2587756, rs8029244, rs10902579, rs12911006, rs12899207, rs972731, rs12914235, rs1910410, rs12595207, rs2654602, rs1503474, rs11634135, rs11629625, rs1393943, rs7164184, rs1985139, rs11247210
4	22	41	0.536585	rs11932978	160643870	rs2348995	160806609	2.57202	3.49449	-		rs6857955, rs1379606, rs1224511, rs11942388, rs6816142, rs6838931, rs4293753, rs4632599, rs10517708, rs13148410, rs2348995, rs11733416, rs7663113, rs7684455, rs4690956, rs6536481, rs4690958, rs11932978, rs6819862, rs2348992, rs1473393, rs2348622
11	24	48	0.5	rs2012496	104218843	rs1487681	104387567	2.62422	3.48597	-	Rs11226373 - Serum matrix metalloproteinase	rs10895702, rs1906308, rs4638278, rs10895692, rs7944328, rs1487716, rs7114728, rs901717, rs1471924, rs1487694, rs4755031, rs4755036, rs1488956, rs2012496, rs10791703, rs6591079, rs1487705, rs10895657, rs4558140, rs11226373, rs10895694, rs1825824, rs1487681, rs11226337
7	23	49	0.469388	rs7796945	104838050	rs12534381	104947195	2.6653	3.41539	SRPK2	(300kb up) Rs10953454 – Obesity (HIP)	rs6466056, rs6954844, rs6466051, rs3801279, rs12538590, rs7794036, rs7805928, rs3779208, rs6972563, rs4406343, rs2079341, rs2079340, rs12155351, rs7808226, rs2299328, rs17640599, rs12154942, rs12534381, rs17640644, rs7790653, rs17640508, rs7796945, rs7780006
12	21	25	0.84	rs10492026	113273490	rs4141253	113325629	2.68015	3.40389	RPH3A		rs1859337, rs10850088, rs3825202, rs4141252, rs4767019, rs886479, rs886476, rs10774667, rs10492026, rs1029484, rs7958347, rs2240194, rs7306609, rs7315734, rs757399, rs4141253, rs2384069, rs7295604, rs10850089, rs3803059, rs4767017
16	23	49	0.469388	rs2549841	81023572	rs935942	81112136	2.61293	3.39745	ATMIN, C16orf46, C16orf61, CENPN	(380kb down) rs11867934 - Diabetic retinopathy	rs13185, rs4889225, rs804885, rs12927239, rs2602401, rs2549841, rs2602443, rs2549887, rs2911150, rs935942, rs13861, rs2602413, rs2602411, rs11866803, rs2602431, rs2549857, rs2549855, rs2549854, rs2549891, rs804904, rs2970077, rs2970076, rs1469123
7	20	46	0.434783	rs6969186	156609134	rs10227139	156770436	2.50116	3.38999	NOM1, LMBR1		rs887611, rs10263848, rs10252508, rs887614, rs1111467, rs12919, rs2969125, rs1861118, rs2365750, rs2969124, rs2302445, rs870917, rs6968856, rs12538789, rs3087905, rs10807643, rs10227139, rs1833140, rs6969186, rs6459710
1	24	30	0.8	rs6679056	158450314	rs11265021	158511810	2.73552	3.36255	OR10R2		rs1578761, rs1894040, rs11264997, rs10489833, rs12121983, rs11264998, rs7512592, rs1873511, rs1873510, rs923663, rs6699473, rs10797020, rs7548349, rs11265002, rs6669271, rs6679056, rs11265007, rs11265009, rs1342958, rs6674656, rs975118, rs1418847, rs2054991, rs11265021
1	40	73	0.547945	rs851202	223426293	rs11261273	223619734	2.63125	3.3614	SUSD4, C1orf65	(600kb up) Rs17465637 – coronary heart disease, early onset myocardial infarction	rs2795063, rs11261273, rs7536652, rs17487717, rs17163762, rs2678369, rs17163767, rs34468460, rs7551911, rs12040106, rs34238669, rs1417748, rs1518040, rs999016, rs825130, rs825133, rs825134, rs1341289, rs3820596, rs851201, rs2487521, rs2138970, rs41371046, rs12093955, rs2176507, rs2176505, rs11811828, rs12134824, rs11799440, rs7526539, rs885279, rs1518044, rs1713209, rs10907376, rs10907377, rs1095…
12	30	49	0.612245	rs10778889	82739258	rs11115314	83000048	2.4561	3.35549	C12orf26, CCDC59		rs11115288, rs11115289, rs2642010, rs11831879, rs10735453, rs10778889, rs7962987, rs2731295, rs4143188, rs4370996, rs2401034, rs2401035, rs11115299, rs10746244, rs10506869, rs7307305, rs4882513, rs7972368, rs11115314, rs10862491, rs10862490, rs7956638, rs2717446, rs2068633, rs4561274, rs4143189, rs4343090, rs17009658, rs7311246, rs1494023
4	22	46	0.478261	rs2343274	60971952	rs4241633	61170648	2.77312	3.3518	-		rs2343274, rs1899293, rs2165482, rs2219213, rs4241633, rs11131228, rs1345046, rs1441307, rs6845525, rs6816453, rs6850184, rs2061156, rs10517502, rs10517501, rs6551526, rs3924779, rs10049506, rs6834427, rs717253, rs717252, rs17291245, rs12511090
3	22	33	0.666667	rs711636	4489777	rs420944	4555388	2.50225	3.35007	SUMF1, ITPR1	(50kb up) rs794185 - Multiple sclerosis--Brain Glutamate Levels	rs2633848, rs2633844, rs2633846, rs304090, rs2259801, rs304094, rs4685753, rs17040776, rs304064, rs304041, rs793398, rs901870, rs10510293, rs304029, rs420944, rs304038, rs304077, rs304073, rs304032, rs711635, rs711636, rs2819577
6	24	49	0.489796	rs6903206	100929516	rs11155606	101163915	2.48815	3.34994	ASCC3		rs10457800, rs239245, rs239189, rs239229, rs4461738, rs1039032, rs1039031, rs12206564, rs11155596, rs2398132, rs240150, rs240153, rs240154, rs11155606, rs239211, rs1875401, rs6903206, rs12374612, rs240148, rs240141, rs11155496, rs239206, rs239203, rs240149
11	21	48	0.4375	rs1939052	101626575	rs1372415	101753231	2.57208	3.33276	-		rs4754814, rs10791523, rs724569, rs1372415, rs1939052, rs1441931, rs1939029, rs4620692, rs7101850, rs5005681, rs2897863, rs7123790, rs10501990, rs2186611, rs10791524, rs1939041, rs10791535, rs1939036, rs7949648, rs10791539, rs1939047
9	21	49	0.428571	rs16911097	99288951	rs10978811	99517669	2.40198	3.32495	C9orf21, CDC14B, ZNF510		rs9886834, rs7041738, rs10978455, rs10114863, rs10816427, rs10978781, rs6477597, rs12337127, rs12340338, rs10120094, rs16911097, rs4335261, rs10978609, rs12004815, rs10125623, rs10118149, rs12340043, rs7046055, rs2165890, rs6477616, rs10978811
2	20	44	0.454545	rs10190015	99018717	rs7588254	99217785	2.27286	3.25891	INPP4A, C2orf64		rs4851131, rs3729568, rs4851133, rs3754881, rs17032120, rs6753380, rs7588254, rs12617721, rs961242, rs10190015, rs17031905, rs6736755, rs17031139, rs6542833, rs3769740, rs3769741, rs17031146, rs11676357, rs13402379, rs6730113
10	21	50	0.42	rs1342576	100829191	rs2862553	101048492	2.33861	3.22367	HPSE2		rs2040022, rs10883299, rs7923494, rs10883279, rs4313503, rs2040023, rs1891463, rs4456193, rs10883293, rs4529840, rs10786525, rs7476183, rs1342576, rs2862515, rs11189991, rs11189965, rs2862553, rs2862542, rs10883302, rs2862544, rs11190034
5	38	133	0.285714	rs3114661	101631343	rs2431531	102108099	2.38798	3.22027	SLCO6A1, SLCO4C1	Rs1502844 – Schizophrenia	rs1376894, rs451819, rs10055023, rs442443, rs11746217, rs401114, rs1869104, rs10075318, rs2545581, rs2657446, rs1545488, rs1597771, rs462957, rs2400798, rs964518, rs1542296, rs2400795, rs3114661, rs1875634, rs9327836, rs1584716, rs1584717, rs9327870, rs382964, rs1645534, rs1913500, rs6596482, rs7727074, rs2545593, rs2198246, rs458256, rs467186, rs258132, rs1376910, rs7734926, rs2671569, rs1005575…
14	27	50	0.54	rs17104103	67661952	rs8022938	67855327	2.42629	3.21981	MPP5, FAM71D, ATP6V1D, EIF2S1, PLEK2		rs8016037, rs17104103, rs2146230, rs9743912, rs10431718, rs8021896, rs2031563, rs8004148, rs10144090, rs8012994, rs6573769, rs12323911, rs10144401, rs8020850, rs28370351, rs10131212, rs17104114, rs17248526, rs8016024, rs1885590, rs10141180, rs8006042, rs1475127, rs1535491, rs8022938, rs8015454, rs11158655
13	24	37	0.648649	rs9569761	34123373	rs9563673	34239526	2.41078	3.19163	-		rs9315226, rs7333539, rs7329126, rs7320319, rs9569943, rs9569966, rs1473766, rs9597918, rs10507413, rs954861, rs9569761, rs9597723, rs9315232, rs9597686, rs9563673, rs1928392, rs7983305, rs7335032, rs9591873, rs1041308, rs4943126, rs9597711, rs4943128, rs7328696
6	21	45	0.466667	rs4711958	13261630	rs641293	13300368	2.60008	3.18677	PHACTR1	(20kb down) rs499818 - Major CVD, (45kb up) rs4715166 - Hip geometry	rs2119485, rs366904, rs442614, rs4711958, rs408923, rs413120, rs693758, rs3846903, rs364884, rs202042, rs435466, rs202044, rs578290, rs202054, rs1512414, rs202053, rs7774863, rs381134, rs1937767, rs20500, rs641293
4	22	43	0.511628	rs11098033	110324528	rs17040510	110454344	2.64279	3.16856	SEC24B, 1/2-SBSRNA4		rs11098035, rs11098033, rs7667502, rs10003981, rs17040498, rs6838597, rs9997563, rs6854516, rs17040410, rs17040439, rs17040433, rs10009463, rs6533431, rs17040510, rs12650654, rs28541279, rs10016533, rs7681265, rs13145066, rs17040461, rs6852062, rs17040466
7	21	50	0.42	rs8177123	142558133	rs6947073	142637062	2.57132	3.16818	C7orf34, TRPV6, EPHB6, TRPV5		rs6947073, rs4987613, rs8177123, rs4252488, rs4236479, rs6966572, rs4252444, rs11979330, rs4987620, rs4252505, rs4252461, rs4252416, rs4252419, rs4252418, rs4987647, rs4252400, rs4987656, rs4236481, rs4252437, rs4987653, rs4252435
9	28	47	0.595745	rs7856303	127878785	rs10114684	128102865	2.59531	3.15773	PPP6C, SCAI, GAPVD1, RABEPK		rs1549314, rs7024631, rs7019288, rs10114684, rs7024471, rs420423, rs13294021, rs7019234, rs7869453, rs10819043, rs4838250, rs7856303, rs10819033, rs7860360, rs466994, rs7019470, rs7021901, rs10760394, rs3962622, rs2113352, rs6478696, rs6478697, rs16928051, rs501963, rs359591, rs4838247, rs10986578, rs465689
5	20	24	0.833333	rs6892770	145949309	rs322500	146019228	2.54411	3.15145	PPP2R2B		rs382817, rs1363745, rs6892770, rs1159045, rs6873275, rs411770, rs322504, rs13165086, rs48624, rs371183, rs322468, rs322485, rs322486, rs322487, rs322500, rs445122, rs167723, rs322477, rs322474, rs13174108
9	23	41	0.560976	rs1121978	95140351	rs2296666	95274261	2.61829	3.1485	CENPP, ECM2, OGN, OMD, ASPN		rs1980848, rs10429459, rs4743873, rs1121978, rs13301537, rs11794346, rs7022562, rs7031567, rs2296666, rs7850528, rs12336415, rs7860786, rs7868013, rs1535754, rs927865, rs10514815, rs4744135, rs4744133, rs10761158, rs3739606, rs12341817, rs7037194, rs12342019
8	22	49	0.44898	rs7010375	125067786	rs6988185	125179381	2.43187	3.14307	FER1L6		rs13269044, rs10090974, rs10103694, rs7008971, rs6984987, rs4242357, rs7832499, rs7007739, rs7818609, rs4871463, rs4510842, rs7839182, rs6991000, rs4430074, rs4431575, rs28719919, rs6988185, rs7012186, rs7010375, rs10097532, rs10094533, rs6470219
7	24	42	0.571429	rs3808168	123588444	rs1860487	123715136	2.49302	3.1417	SPAM1, TMEM229A		rs7804904, rs10255200, rs960356, rs3808168, rs17146605, rs11975640, rs12706565, rs13232441, rs10254660, rs11973429, rs10231282, rs7777822, rs12154234, rs10282219, rs10271762, rs1860487, rs10953986, rs2253692, rs13229421, rs10260580, rs17146532, rs6953544, rs4385412, rs7808465
12	23	50	0.46	rs597685	53070688	rs4761948	53135502	2.48319	3.11408	KRT1, KRT77		rs2171586, rs2171585, rs676255, rs10747651, rs10747650, rs2741158, rs597685, rs7969242, rs637419, rs1567757, rs7956525, rs864344, rs10747645, rs7963098, rs4761943, rs4761808, rs3759191, rs7138818, rs4761948, rs828113, rs10783535, rs10876328, rs2741159
5	29	49	0.591837	rs7715782	43566930	rs4866756	43927216	2.56104	3.09524	NNT		rs7729400, rs10062920, rs6895313, rs7728182, rs4280875, rs4516856, rs13174140, rs6897559, rs13163767, rs4403180, rs35072002, rs6875400, rs7736477, rs10045029, rs6879866, rs4449542, rs10069341, rs7728434, rs7721405, rs6451723, rs4866756, rs10057692, rs13357293, rs7715782, rs10045432, rs6899051, rs7732326, rs6862256, rs7717679
5	24	44	0.545455	rs6890469	42949990	rs316413	43094029	2.66315	3.0904	-		rs2548345, rs2548343, rs186322, rs309906, rs6883097, rs309909, rs316414, rs309923, rs6890469, rs316413, rs6899257, rs11747714, rs9292862, rs1542369, rs3893725, rs4092293, rs309950, rs13158641, rs2548334, rs316408, rs2603656, rs316404, rs160709, rs222060
9	25	49	0.510204	rs216364	33818257	rs1785509	34028285	2.39403	3.08062	UBE2R2, UBAP2		rs7019647, rs544169, rs2196, rs834027, rs1785512, rs307697, rs307691, rs2486675, rs6476429, rs4817, rs471371, rs10814059, rs307651, rs307652, rs307654, rs216364, rs1785509, rs1785506, rs2248910, rs2248071, rs216367, rs12555291, rs1758633, rs307649, rs307646
2	22	50	0.44	rs4129805	100586506	rs4851256	100775045	2.44784	3.02953	AFF3	(50kb down) Rs9653442 – type 1 diabetes	rs13385193, rs1561230, rs4129805, rs11123810, rs11685341, rs6706188, rs1115910, rs11885529, rs11692215, rs11677607, rs13003982, rs11694875, rs961788, rs11690905, rs2309750, rs7582731, rs2118280, rs4851256, rs12712066, rs1437377, rs11681966, rs7605430
2	28	50	0.56	rs893256	209168853	rs717575	209250328	2.57051	3.02922	PIKFYVE		rs4675754, rs994696, rs994697, rs10186531, rs6435446, rs10932259, rs2363579, rs2118296, rs976247, rs2118297, rs16841092, rs2118295, rs6725932, rs717575, rs1529979, rs1866044, rs2363468, rs2363469, rs6435453, rs10208191, rs6435450, rs2304544, rs16840898, rs1465804, rs1370370, rs893255, rs893256, rs9646839
1	21	46	0.456522	rs1975283	118142558	rs731017	118225681	2.45607	3.02447	FAM46C	Rs17038182 – height (600kb down)	rs319507, rs319506, rs319505, rs6696923, rs6428707, rs319500, rs1808806, rs965574, rs1992117, rs377875, rs963264, rs10923360, rs2576570, rs68178, rs10923385, rs3754120, rs7549770, rs731017, rs1775831, rs826403, rs1975283
3	21	46	0.456522	rs6794868	37887360	rs9843296	38043904	2.38616	2.97409	CTDSPL, VILL	Rs9311171 – prostate cancer	rs7633540, rs9311167, rs6790217, rs9826388, rs6792008, rs9816217, rs2012641, rs11713329, rs6779021, rs6800173, rs6775702, rs928807, rs11715770, rs9816379, rs9869652, rs9858321, rs6794868, rs1812423, rs9826470, rs9311168, rs9843296
1	27	50	0.54	rs2226284	70335682	rs17131215	70580058	2.31712	2.92442	LRRC7		rs1009125, rs1913270, rs6704345, rs2226284, rs12025637, rs7413084, rs6663915, rs6424609, rs11209577, rs17131215, rs1590724, rs2211659, rs984950, rs4650020, rs4623650, rs583035, rs12032656, rs7530457, rs11579093, rs6694951, rs10493464, rs6695450, rs10493463, rs17131208, rs17131204, rs2421308, rs10493469
2	23	50	0.46	rs6541782	122300240	rs6754910	122492983	2.36866	2.85534	CLASP1, MKI67IP		rs17039745, rs6541793, rs2034138, rs7581005, rs1551151, rs17006779, rs6735067, rs10496573, rs6717212, rs3980085, rs4482489, rs12616610, rs6746090, rs11122861, rs6754910, rs12616209, rs6541786, rs6541785, rs6541782, rs17006765, rs17016977, rs6732282, rs6726677
9	20	49	0.408163	rs2780241	120738659	rs2722816	120864045	2.36072	2.84851	-		rs2809407, rs2809420, rs2806081, rs2780238, rs9408905, rs2252957, rs2722805, rs2809369, rs2722868, rs2780246, rs1930719, rs2722810, rs2722831, rs2780241, rs2722816, rs2806093, rs2722806, rs2806094, rs2806098, rs2806085
12	23	49	0.469388	rs7956194	109877825	rs11067376	110027795	2.27518	2.82943	MMAB, MVK, KCTD10, MYO1H, UBE3B	Rs2338104 – HDL cholesterol, (40kb up) rs9943753 - HDL cholesterol, (240kb down) rs2292354 - Metabolic syndrome	rs11067231, rs3759387, rs4766602, rs7956194, rs731178, rs10466917, rs7313797, rs2241215, rs7298565, rs2058804, rs2058807, rs888192, rs2338104, rs11836136, rs7486178, rs1075467, rs877710, rs754179, rs11067376, rs10774708, rs6606731, rs7956536, rs7300998
22	20	41	0.487805	rs1633399	19183787	rs2800976	19256971	2.37748	2.81726	CLTCL1		rs1206542, rs807459, rs1633404, rs1206555, rs2800976, rs807547, rs807467, rs807464, rs807465, rs807462, rs1633399, rs712952, rs712955, rs712954, rs712957, rs809416, rs807468, rs2518866, rs807430, rs1206554
8	24	49	0.489796	rs11985133	81589362	rs7837508	81753399	2.4394	2.76754	ZNF704		rs6992620, rs7837508, rs12114287, rs2007431, rs6986548, rs11985133, rs11993848, rs6992359, rs6473248, rs11994145, rs10504717, rs6473241, rs6473242, rs6987849, rs6473246, rs7834675, rs16907976, rs16908070, rs7017219, rs3907424, rs11998091, rs7829424, rs7833234, rs16908080
8	26	45	0.577778	rs4995528	99477666	rs6988087	99730651	2.32786	2.70446	STK3		rs7011763, rs12547922, rs13270534, rs4130753, rs7007360, rs6651182, rs10955186, rs10955187, rs34114299, rs10955181, rs12056323, rs6991043, rs10441501, rs4995528, rs12542758, rs12677183, rs6993480, rs11985382, rs6988087, rs4735564, rs10099978, rs4348458, rs3802198, rs4734407, rs12542069, rs4388428
2	21	28	0.75	rs10191994	12422123	rs6708491	12509020	2.30552	2.69101	-	Rs1534422 - Type 1 diabetes (140kb down), Rs10929808 - Bipolar disorder and schizophrenia (68kb down)	rs10196273, rs1530980, rs6708491, rs12692476, rs3856471, rs12470082, rs6432285, rs12463456, rs6761842, rs10929805, rs4669836, rs10929800, rs10191994, rs2118518, rs1453499, rs6734624, rs1020608, rs12329240, rs10929803, rs4669843, rs6710595
