# Supplementary material for: Lactase Persistence and Lipid Pathway Selection in the Maasai
Source: PLoS One. 2012 Sep 28;7(9):e44751. doi: 10.1371/journal.pone.0044751 (PMC3461017; doi:10.1371/journal.pone.0044751)
Supplement: Table S7 — Common regions and SNPs identified to be under selection in MKK by our analysis (using Fst, iHS and XP-EHH) and by the International HapMap Consortium (using the CMS test). Only those SNPs identified by the HapMap Consortium which were also identified by our analysis (i.e. passed genome-wide significance thresholds for the Fst, iHS, and XP-EHH statistic respectively) are listed. (XLSX) [file pone.0044751.s007.xlsx]

## Sheet: Sheet1
Chromosome	Start Position	Stop Position	Size	Genes	No. of significant Fst SNPs	No. of significant iHS SNPs	No. of significant XP-EHH SNPs
2	88910226	89100580	190354	EIF2AK3, RPIA, FLJ40330	1	0	0
2	134501207	134529356	28149	-	0	13	5
2	135762344	136292425	530081	YSK4, RAB3GAP1, ZRANB3, R3HDM1	66	75	200
3	191939916	191990575	50659	FGF12	8	0	11
5	14747247	14750481	3234	ANKH	3	7	8
5	115885282	115885858	576	SEMA6A	2	0	5
9	31434342	31523416	89074	-	0	0	0
9	38739591	38746937	7346	-	0	0	0
9	139977351	139980417	3066	UAP1L1, LOC100289341, MAN1B1, DPP7	0	0	0
10	135369532	135377448	7916	SYCE	0	0	0
16	31764781	31803385	38604	C16orf67, ZNF720	0	0	0
16	34362218	34607359	245141	UBE2MP1, LOC283914	0	0	0
18	66695216	66726669	31453	CCDC102B	4	11	11
18	67613926	67729333	115407	CD226, RTTN	0	0	0
